# Supplementary material for: Characterization of components of resistance to Corn Stunt disease
Source: PLoS One. 2020 Oct 19;15(10):e0234454. doi: 10.1371/journal.pone.0234454 (PMC7571704; doi:10.1371/journal.pone.0234454)
Supplement: S1 File — (XLSX) [file pone.0234454.s001.xlsx]

## Sheet: Preference
Rep	Genotyp	Moment	# Insects	Total Insects
1	DK72-10	1	0	2
2	DK72-10	1	0	2
3	DK72-10	1	0	2
4	DK72-10	1	0	1
5	DK72-10	1	1	1
6	DK72-10	1	0	1
7	DK72-10	1	0	0
8	DK72-10	1	1	2
9	DK72-10	1	1	2
10	DK72-10	1	0	1
11	DK72-10	1	0	1
12	DK72-10	1	0	0
13	DK72-10	1	0	1
14	DK72-10	1	1	1
15	DK72-10	1	0	0
16	DK72-10	1	0	4
17	DK72-10	1	0	1
18	DK72-10	1	0	2
19	DK72-10	1	1	1
20	DK72-10	1	0	4
21	DK72-10	1	0	4
22	DK72-10	1	0	1
23	DK72-10	1	0	3
24	DK72-10	1	0	1
25	DK72-10	1	0	0
26	DK72-10	1	1	1
27	DK72-10	1	0	0
28	DK72-10	1	1	1
29	DK72-10	1	1	2
30	DK72-10	1	1	2
31	DK72-10	1	1	3
32	DK72-10	1	1	1
33	DK72-10	1	1	2
34	DK72-10	1	1	3
35	DK72-10	1	0	4
36	DK72-10	1	0	1
37	DK72-10	1	0	1
38	DK72-10	1	0	0
39	DK72-10	1	0	0
40	DK72-10	1	0	0
41	DK72-10	1	0	0
42	DK72-10	1	0	1
43	DK72-10	1	0	1
44	DK72-10	1	1	2
45	DK72-10	1	0	4
46	DK72-10	1	2	3
47	DK72-10	1	1	3
48	DK72-10	1	0	0
49	DK72-10	1	0	0
50	DK72-10	1	0	0
1	DK72-10	6	0	1
2	DK72-10	6	1	3
3	DK72-10	6	0	2
4	DK72-10	6	0	2
5	DK72-10	6	1	1
6	DK72-10	6	1	3
7	DK72-10	6	3	4
8	DK72-10	6	3	5
9	DK72-10	6	0	6
10	DK72-10	6	2	6
11	DK72-10	6	1	5
12	DK72-10	6	1	5
13	DK72-10	6	2	5
14	DK72-10	6	3	5
15	DK72-10	6	1	5
16	DK72-10	6	0	3
17	DK72-10	6	1	3
18	DK72-10	6	0	5
19	DK72-10	6	1	3
20	DK72-10	6	0	5
21	DK72-10	6	1	5
22	DK72-10	6	0	4
23	DK72-10	6	0	5
24	DK72-10	6	0	1
25	DK72-10	6	2	5
26	DK72-10	6	0	2
27	DK72-10	6	0	2
28	DK72-10	6	2	3
29	DK72-10	6	2	5
30	DK72-10	6	2	6
31	DK72-10	6	1	5
32	DK72-10	6	3	5
33	DK72-10	6	1	4
34	DK72-10	6	3	5
35	DK72-10	6	0	6
36	DK72-10	6	0	3
37	DK72-10	6	0	3
38	DK72-10	6	2	6
39	DK72-10	6	1	4
40	DK72-10	6	1	2
41	DK72-10	6	2	4
42	DK72-10	6	0	3
43	DK72-10	6	3	5
44	DK72-10	6	3	6
45	DK72-10	6	0	5
46	DK72-10	6	0	4
47	DK72-10	6	1	4
48	DK72-10	6	1	1
49	DK72-10	6	0	2
50	DK72-10	6	0	1
1	DK72-10	24	1	5
2	DK72-10	24	2	4
3	DK72-10	24	0	4
4	DK72-10	24	0	3
5	DK72-10	24	1	3
6	DK72-10	24	1	3
7	DK72-10	24	0	1
8	DK72-10	24	2	5
9	DK72-10	24	0	6
10	DK72-10	24	1	5
11	DK72-10	24	0	4
12	DK72-10	24	0	6
13	DK72-10	24	1	4
14	DK72-10	24	3	5
15	DK72-10	24	0	6
16	DK72-10	24	0	3
17	DK72-10	24	0	5
18	DK72-10	24	0	5
19	DK72-10	24	2	5
20	DK72-10	24	0	4
21	DK72-10	24	1	4
22	DK72-10	24	0	4
23	DK72-10	24	0	5
24	DK72-10	24	0	5
25	DK72-10	24	2	6
26	DK72-10	24	1	5
27	DK72-10	24	0	4
28	DK72-10	24	2	3
29	DK72-10	24	2	6
30	DK72-10	24	1	6
31	DK72-10	24	1	5
32	DK72-10	24	0	5
33	DK72-10	24	1	6
34	DK72-10	24	0	5
35	DK72-10	24	0	5
36	DK72-10	24	0	4
37	DK72-10	24	1	4
38	DK72-10	24	0	4
39	DK72-10	24	1	6
40	DK72-10	24	1	3
41	DK72-10	24	1	5
42	DK72-10	24	1	3
43	DK72-10	24	2	4
44	DK72-10	24	1	6
45	DK72-10	24	0	5
46	DK72-10	24	1	5
47	DK72-10	24	0	6
48	DK72-10	24	2	4
49	DK72-10	24	1	4
50	DK72-10	24	1	5
1	DK72-10	48	2	6
2	DK72-10	48	1	6
3	DK72-10	48	1	3
4	DK72-10	48	0	3
5	DK72-10	48	2	5
6	DK72-10	48	3	6
7	DK72-10	48	2	5
8	DK72-10	48	0	5
9	DK72-10	48	0	6
10	DK72-10	48	1	4
11	DK72-10	48	0	3
12	DK72-10	48	1	6
13	DK72-10	48	2	6
14	DK72-10	48	1	4
15	DK72-10	48	0	6
16	DK72-10	48	0	3
17	DK72-10	48	0	5
18	DK72-10	48	0	5
19	DK72-10	48	1	4
20	DK72-10	48	0	6
21	DK72-10	48	0	5
22	DK72-10	48	0	5
23	DK72-10	48	0	3
24	DK72-10	48	1	5
25	DK72-10	48	1	5
26	DK72-10	48	0	5
27	DK72-10	48	0	4
28	DK72-10	48	1	3
29	DK72-10	48	0	6
30	DK72-10	48	0	6
31	DK72-10	48	3	5
32	DK72-10	48	0	5
33	DK72-10	48	1	6
34	DK72-10	48	2	5
35	DK72-10	48	0	5
36	DK72-10	48	0	5
37	DK72-10	48	1	6
38	DK72-10	48	0	4
39	DK72-10	48	1	5
40	DK72-10	48	0	4
41	DK72-10	48	0	5
42	DK72-10	48	2	4
43	DK72-10	48	3	4
44	DK72-10	48	0	5
45	DK72-10	48	0	5
46	DK72-10	48	2	5
47	DK72-10	48	1	6
48	DK72-10	48	3	4
49	DK72-10	48	2	4
50	DK72-10	48	1	3
1	DK79-10	1	0	2
2	DK79-10	1	0	2
3	DK79-10	1	0	2
4	DK79-10	1	0	1
5	DK79-10	1	0	1
6	DK79-10	1	0	1
7	DK79-10	1	0	0
8	DK79-10	1	0	2
9	DK79-10	1	0	2
10	DK79-10	1	1	1
11	DK79-10	1	0	1
12	DK79-10	1	0	0
13	DK79-10	1	1	1
14	DK79-10	1	0	1
15	DK79-10	1	0	0
16	DK79-10	1	1	4
17	DK79-10	1	0	1
18	DK79-10	1	1	2
19	DK79-10	1	0	1
20	DK79-10	1	0	4
21	DK79-10	1	2	4
22	DK79-10	1	1	1
23	DK79-10	1	1	3
24	DK79-10	1	1	1
25	DK79-10	1	0	0
26	DK79-10	1	0	1
27	DK79-10	1	0	0
28	DK79-10	1	0	1
29	DK79-10	1	0	2
30	DK79-10	1	0	2
31	DK79-10	1	0	3
32	DK79-10	1	0	1
33	DK79-10	1	1	2
34	DK79-10	1	0	3
35	DK79-10	1	3	4
36	DK79-10	1	0	1
37	DK79-10	1	0	1
38	DK79-10	1	0	0
39	DK79-10	1	0	0
40	DK79-10	1	0	0
41	DK79-10	1	0	0
42	DK79-10	1	0	1
43	DK79-10	1	0	1
44	DK79-10	1	1	2
45	DK79-10	1	0	4
46	DK79-10	1	0	3
47	DK79-10	1	0	3
48	DK79-10	1	0	0
49	DK79-10	1	0	0
50	DK79-10	1	0	0
1	DK79-10	6	0	1
2	DK79-10	6	0	3
3	DK79-10	6	1	2
4	DK79-10	6	0	2
5	DK79-10	6	0	1
6	DK79-10	6	0	3
7	DK79-10	6	1	4
8	DK79-10	6	1	5
9	DK79-10	6	1	6
10	DK79-10	6	1	6
11	DK79-10	6	0	5
12	DK79-10	6	1	5
13	DK79-10	6	3	5
14	DK79-10	6	0	5
15	DK79-10	6	1	5
16	DK79-10	6	0	3
17	DK79-10	6	1	3
18	DK79-10	6	1	5
19	DK79-10	6	1	3
20	DK79-10	6	2	5
21	DK79-10	6	1	5
22	DK79-10	6	2	4
23	DK79-10	6	1	5
24	DK79-10	6	1	1
25	DK79-10	6	2	5
26	DK79-10	6	0	2
27	DK79-10	6	0	2
28	DK79-10	6	0	3
29	DK79-10	6	2	5
30	DK79-10	6	2	6
31	DK79-10	6	1	5
32	DK79-10	6	0	5
33	DK79-10	6	1	4
34	DK79-10	6	0	5
35	DK79-10	6	5	6
36	DK79-10	6	1	3
37	DK79-10	6	0	3
38	DK79-10	6	0	6
39	DK79-10	6	2	4
40	DK79-10	6	0	2
41	DK79-10	6	2	4
42	DK79-10	6	1	3
43	DK79-10	6	0	5
44	DK79-10	6	3	6
45	DK79-10	6	0	5
46	DK79-10	6	1	4
47	DK79-10	6	0	4
48	DK79-10	6	0	1
49	DK79-10	6	1	2
50	DK79-10	6	0	1
1	DK79-10	24	0	5
2	DK79-10	24	2	4
3	DK79-10	24	1	4
4	DK79-10	24	0	3
5	DK79-10	24	1	3
6	DK79-10	24	0	3
7	DK79-10	24	1	1
8	DK79-10	24	1	5
9	DK79-10	24	3	6
10	DK79-10	24	1	5
11	DK79-10	24	0	4
12	DK79-10	24	1	6
13	DK79-10	24	1	4
14	DK79-10	24	0	5
15	DK79-10	24	3	6
16	DK79-10	24	0	3
17	DK79-10	24	4	5
18	DK79-10	24	1	5
19	DK79-10	24	1	5
20	DK79-10	24	0	4
21	DK79-10	24	1	4
22	DK79-10	24	2	4
23	DK79-10	24	2	5
24	DK79-10	24	4	5
25	DK79-10	24	3	6
26	DK79-10	24	1	5
27	DK79-10	24	0	4
28	DK79-10	24	0	3
29	DK79-10	24	2	6
30	DK79-10	24	3	6
31	DK79-10	24	2	5
32	DK79-10	24	1	5
33	DK79-10	24	1	6
34	DK79-10	24	1	5
35	DK79-10	24	4	5
36	DK79-10	24	2	4
37	DK79-10	24	1	4
38	DK79-10	24	4	4
39	DK79-10	24	0	6
40	DK79-10	24	1	3
41	DK79-10	24	1	5
42	DK79-10	24	0	3
43	DK79-10	24	0	4
44	DK79-10	24	4	6
45	DK79-10	24	0	5
46	DK79-10	24	2	5
47	DK79-10	24	0	6
48	DK79-10	24	0	4
49	DK79-10	24	2	4
50	DK79-10	24	1	5
1	DK79-10	48	0	6
2	DK79-10	48	1	6
3	DK79-10	48	0	3
4	DK79-10	48	0	3
5	DK79-10	48	1	5
6	DK79-10	48	0	6
7	DK79-10	48	2	5
8	DK79-10	48	1	5
9	DK79-10	48	4	6
10	DK79-10	48	1	4
11	DK79-10	48	0	3
12	DK79-10	48	2	6
13	DK79-10	48	0	6
14	DK79-10	48	0	4
15	DK79-10	48	5	6
16	DK79-10	48	0	3
17	DK79-10	48	3	5
18	DK79-10	48	1	5
19	DK79-10	48	1	4
20	DK79-10	48	2	6
21	DK79-10	48	1	5
22	DK79-10	48	3	5
23	DK79-10	48	0	3
24	DK79-10	48	1	5
25	DK79-10	48	3	5
26	DK79-10	48	2	5
27	DK79-10	48	0	4
28	DK79-10	48	0	3
29	DK79-10	48	4	6
30	DK79-10	48	4	6
31	DK79-10	48	1	5
32	DK79-10	48	1	5
33	DK79-10	48	1	6
34	DK79-10	48	1	5
35	DK79-10	48	4	5
36	DK79-10	48	2	5
37	DK79-10	48	1	6
38	DK79-10	48	1	4
39	DK79-10	48	4	5
40	DK79-10	48	1	4
41	DK79-10	48	3	5
42	DK79-10	48	1	4
43	DK79-10	48	0	4
44	DK79-10	48	2	5
45	DK79-10	48	0	5
46	DK79-10	48	0	5
47	DK79-10	48	0	6
48	DK79-10	48	0	4
49	DK79-10	48	1	4
50	DK79-10	48	2	3
1	DK670	1	2	2
2	DK670	1	2	2
3	DK670	1	2	2
4	DK670	1	0	1
5	DK670	1	0	1
6	DK670	1	0	1
7	DK670	1	0	0
8	DK670	1	0	2
9	DK670	1	0	2
10	DK670	1	0	1
11	DK670	1	1	1
12	DK670	1	0	0
13	DK670	1	0	1
14	DK670	1	0	1
15	DK670	1	0	0
16	DK670	1	0	4
17	DK670	1	0	1
18	DK670	1	1	2
19	DK670	1	0	1
20	DK670	1	4	4
21	DK670	1	1	4
22	DK670	1	0	1
23	DK670	1	2	3
24	DK670	1	0	1
25	DK670	1	0	0
26	DK670	1	0	1
27	DK670	1	0	0
28	DK670	1	0	1
29	DK670	1	1	2
30	DK670	1	0	2
31	DK670	1	1	3
32	DK670	1	0	1
33	DK670	1	0	2
34	DK670	1	1	3
35	DK670	1	0	4
36	DK670	1	1	1
37	DK670	1	1	1
38	DK670	1	0	0
39	DK670	1	0	0
40	DK670	1	0	0
41	DK670	1	0	0
42	DK670	1	1	1
43	DK670	1	1	1
44	DK670	1	0	2
45	DK670	1	3	4
46	DK670	1	0	3
47	DK670	1	1	3
48	DK670	1	0	0
49	DK670	1	0	0
50	DK670	1	0	0
1	DK670	6	1	1
2	DK670	6	2	3
3	DK670	6	1	2
4	DK670	6	1	2
5	DK670	6	0	1
6	DK670	6	1	3
7	DK670	6	0	4
8	DK670	6	1	5
9	DK670	6	2	6
10	DK670	6	3	6
11	DK670	6	2	5
12	DK670	6	1	5
13	DK670	6	0	5
14	DK670	6	1	5
15	DK670	6	2	5
16	DK670	6	0	3
17	DK670	6	0	3
18	DK670	6	4	5
19	DK670	6	0	3
20	DK670	6	3	5
21	DK670	6	1	5
22	DK670	6	0	4
23	DK670	6	4	5
24	DK670	6	0	1
25	DK670	6	0	5
26	DK670	6	1	2
27	DK670	6	1	2
28	DK670	6	0	3
29	DK670	6	1	5
30	DK670	6	0	6
31	DK670	6	1	5
32	DK670	6	0	5
33	DK670	6	0	4
34	DK670	6	1	5
35	DK670	6	0	6
36	DK670	6	2	3
37	DK670	6	2	3
38	DK670	6	2	6
39	DK670	6	0	4
40	DK670	6	1	2
41	DK670	6	0	4
42	DK670	6	2	3
43	DK670	6	2	5
44	DK670	6	0	6
45	DK670	6	5	5
46	DK670	6	3	4
47	DK670	6	3	4
48	DK670	6	0	1
49	DK670	6	1	2
50	DK670	6	1	1
1	DK670	24	3	5
2	DK670	24	0	4
3	DK670	24	3	4
4	DK670	24	2	3
5	DK670	24	0	3
6	DK670	24	1	3
7	DK670	24	0	1
8	DK670	24	2	5
9	DK670	24	1	6
10	DK670	24	3	5
11	DK670	24	2	4
12	DK670	24	1	6
13	DK670	24	2	4
14	DK670	24	0	5
15	DK670	24	2	6
16	DK670	24	0	3
17	DK670	24	1	5
18	DK670	24	4	5
19	DK670	24	1	5
20	DK670	24	2	4
21	DK670	24	1	4
22	DK670	24	0	4
23	DK670	24	3	5
24	DK670	24	1	5
25	DK670	24	0	6
26	DK670	24	2	5
27	DK670	24	3	4
28	DK670	24	1	3
29	DK670	24	1	6
30	DK670	24	1	6
31	DK670	24	0	5
32	DK670	24	2	5
33	DK670	24	2	6
34	DK670	24	1	5
35	DK670	24	0	5
36	DK670	24	2	4
37	DK670	24	2	4
38	DK670	24	0	4
39	DK670	24	3	6
40	DK670	24	0	3
41	DK670	24	2	5
42	DK670	24	2	3
43	DK670	24	2	4
44	DK670	24	1	6
45	DK670	24	5	5
46	DK670	24	2	5
47	DK670	24	6	6
48	DK670	24	1	4
49	DK670	24	0	4
50	DK670	24	1	5
1	DK670	48	2	6
2	DK670	48	3	6
3	DK670	48	2	3
4	DK670	48	2	3
5	DK670	48	1	5
6	DK670	48	2	6
7	DK670	48	0	5
8	DK670	48	4	5
9	DK670	48	1	6
10	DK670	48	2	4
11	DK670	48	1	3
12	DK670	48	1	6
13	DK670	48	4	6
14	DK670	48	1	4
15	DK670	48	1	6
16	DK670	48	1	3
17	DK670	48	2	5
18	DK670	48	4	5
19	DK670	48	2	4
20	DK670	48	2	6
21	DK670	48	2	5
22	DK670	48	1	5
23	DK670	48	3	3
24	DK670	48	3	5
25	DK670	48	0	5
26	DK670	48	2	5
27	DK670	48	4	4
28	DK670	48	2	3
29	DK670	48	1	6
30	DK670	48	1	6
31	DK670	48	0	5
32	DK670	48	1	5
33	DK670	48	4	6
34	DK670	48	1	5
35	DK670	48	0	5
36	DK670	48	3	5
37	DK670	48	4	6
38	DK670	48	2	4
39	DK670	48	0	5
40	DK670	48	1	4
41	DK670	48	2	5
42	DK670	48	0	4
43	DK670	48	1	4
44	DK670	48	3	5
45	DK670	48	5	5
46	DK670	48	3	5
47	DK670	48	5	6
48	DK670	48	1	4
49	DK670	48	0	4
50	DK670	48	0	3
1	DKB390	1	0	2
2	DKB390	1	0	2
3	DKB390	1	0	2
4	DKB390	1	1	1
5	DKB390	1	0	1
6	DKB390	1	1	1
7	DKB390	1	0	0
8	DKB390	1	1	2
9	DKB390	1	1	2
10	DKB390	1	0	1
11	DKB390	1	0	1
12	DKB390	1	0	0
13	DKB390	1	0	1
14	DKB390	1	0	1
15	DKB390	1	0	0
16	DKB390	1	3	4
17	DKB390	1	1	1
18	DKB390	1	0	2
19	DKB390	1	0	1
20	DKB390	1	0	4
21	DKB390	1	1	4
22	DKB390	1	0	1
23	DKB390	1	0	3
24	DKB390	1	0	1
25	DKB390	1	0	0
26	DKB390	1	0	1
27	DKB390	1	0	0
28	DKB390	1	0	1
29	DKB390	1	0	2
30	DKB390	1	1	2
31	DKB390	1	1	3
32	DKB390	1	0	1
33	DKB390	1	0	2
34	DKB390	1	1	3
35	DKB390	1	1	4
36	DKB390	1	0	1
37	DKB390	1	0	1
38	DKB390	1	0	0
39	DKB390	1	0	0
40	DKB390	1	0	0
41	DKB390	1	0	0
42	DKB390	1	0	1
43	DKB390	1	0	1
44	DKB390	1	0	2
45	DKB390	1	1	4
46	DKB390	1	1	3
47	DKB390	1	1	3
48	DKB390	1	0	0
49	DKB390	1	0	0
50	DKB390	1	0	0
1	DKB390	6	0	1
2	DKB390	6	0	3
3	DKB390	6	0	2
4	DKB390	6	1	2
5	DKB390	6	0	1
6	DKB390	6	1	3
7	DKB390	6	0	4
8	DKB390	6	0	5
9	DKB390	6	3	6
10	DKB390	6	0	6
11	DKB390	6	2	5
12	DKB390	6	2	5
13	DKB390	6	0	5
14	DKB390	6	1	5
15	DKB390	6	1	5
16	DKB390	6	3	3
17	DKB390	6	1	3
18	DKB390	6	0	5
19	DKB390	6	1	3
20	DKB390	6	0	5
21	DKB390	6	2	5
22	DKB390	6	2	4
23	DKB390	6	0	5
24	DKB390	6	0	1
25	DKB390	6	1	5
26	DKB390	6	1	2
27	DKB390	6	1	2
28	DKB390	6	1	3
29	DKB390	6	0	5
30	DKB390	6	2	6
31	DKB390	6	2	5
32	DKB390	6	2	5
33	DKB390	6	2	4
34	DKB390	6	1	5
35	DKB390	6	1	6
36	DKB390	6	0	3
37	DKB390	6	1	3
38	DKB390	6	2	6
39	DKB390	6	1	4
40	DKB390	6	0	2
41	DKB390	6	0	4
42	DKB390	6	0	3
43	DKB390	6	0	5
44	DKB390	6	0	6
45	DKB390	6	0	5
46	DKB390	6	0	4
47	DKB390	6	0	4
48	DKB390	6	0	1
49	DKB390	6	0	2
50	DKB390	6	0	1
1	DKB390	24	1	5
2	DKB390	24	0	4
3	DKB390	24	0	4
4	DKB390	24	1	3
5	DKB390	24	1	3
6	DKB390	24	1	3
7	DKB390	24	0	1
8	DKB390	24	0	5
9	DKB390	24	2	6
10	DKB390	24	0	5
11	DKB390	24	2	4
12	DKB390	24	4	6
13	DKB390	24	0	4
14	DKB390	24	2	5
15	DKB390	24	1	6
16	DKB390	24	3	3
17	DKB390	24	0	5
18	DKB390	24	0	5
19	DKB390	24	1	5
20	DKB390	24	2	4
21	DKB390	24	1	4
22	DKB390	24	2	4
23	DKB390	24	0	5
24	DKB390	24	0	5
25	DKB390	24	1	6
26	DKB390	24	1	5
27	DKB390	24	1	4
28	DKB390	24	0	3
29	DKB390	24	1	6
30	DKB390	24	1	6
31	DKB390	24	2	5
32	DKB390	24	2	5
33	DKB390	24	2	6
34	DKB390	24	3	5
35	DKB390	24	1	5
36	DKB390	24	0	4
37	DKB390	24	0	4
38	DKB390	24	0	4
39	DKB390	24	2	6
40	DKB390	24	1	3
41	DKB390	24	1	5
42	DKB390	24	0	3
43	DKB390	24	0	4
44	DKB390	24	0	6
45	DKB390	24	0	5
46	DKB390	24	0	5
47	DKB390	24	0	6
48	DKB390	24	1	4
49	DKB390	24	1	4
50	DKB390	24	2	5
1	DKB390	48	2	6
2	DKB390	48	1	6
3	DKB390	48	0	3
4	DKB390	48	1	3
5	DKB390	48	1	5
6	DKB390	48	1	6
7	DKB390	48	1	5
8	DKB390	48	0	5
9	DKB390	48	1	6
10	DKB390	48	0	4
11	DKB390	48	2	3
12	DKB390	48	2	6
13	DKB390	48	0	6
14	DKB390	48	2	4
15	DKB390	48	0	6
16	DKB390	48	2	3
17	DKB390	48	0	5
18	DKB390	48	0	5
19	DKB390	48	0	4
20	DKB390	48	2	6
21	DKB390	48	2	5
22	DKB390	48	1	5
23	DKB390	48	0	3
24	DKB390	48	0	5
25	DKB390	48	1	5
26	DKB390	48	1	5
27	DKB390	48	0	4
28	DKB390	48	0	3
29	DKB390	48	1	6
30	DKB390	48	1	6
31	DKB390	48	1	5
32	DKB390	48	3	5
33	DKB390	48	0	6
34	DKB390	48	1	5
35	DKB390	48	1	5
36	DKB390	48	0	5
37	DKB390	48	0	6
38	DKB390	48	1	4
39	DKB390	48	0	5
40	DKB390	48	2	4
41	DKB390	48	0	5
42	DKB390	48	1	4
43	DKB390	48	0	4
44	DKB390	48	0	5
45	DKB390	48	0	5
46	DKB390	48	0	5
47	DKB390	48	0	6
48	DKB390	48	0	4
49	DKB390	48	1	4
50	DKB390	48	0	3
1	Caja	1	4
1	Caja	6	5
1	Caja	24	1
1	Caja	48	0
10	Caja	1	5
10	Caja	6	0
10	Caja	24	1
10	Caja	48	2
11	Caja	1	5
11	Caja	6	1
11	Caja	24	2
11	Caja	48	3
12	Caja	1	6
12	Caja	6	1
12	Caja	24	0
12	Caja	48	0
13	Caja	1	5
13	Caja	6	1
13	Caja	24	2
13	Caja	48	0
14	Caja	1	5
14	Caja	6	1
14	Caja	24	1
14	Caja	48	2
15	Caja	1	6
15	Caja	6	1
15	Caja	24	0
15	Caja	48	0
16	Caja	1	2
16	Caja	6	3
16	Caja	24	3
16	Caja	48	3
17	Caja	1	5
17	Caja	6	3
17	Caja	24	1
17	Caja	48	1
18	Caja	1	4
18	Caja	6	1
18	Caja	24	1
18	Caja	48	1
19	Caja	1	5
19	Caja	6	3
19	Caja	24	1
19	Caja	48	2
2	Caja	1	4
2	Caja	6	3
2	Caja	24	2
2	Caja	48	0
20	Caja	1	2
20	Caja	6	1
20	Caja	24	2
20	Caja	48	0
21	Caja	1	2
21	Caja	6	1
21	Caja	24	2
21	Caja	48	1
22	Caja	1	5
22	Caja	6	2
22	Caja	24	2
22	Caja	48	1
23	Caja	1	3
23	Caja	6	1
23	Caja	24	1
23	Caja	48	3
24	Caja	1	5
24	Caja	6	5
24	Caja	24	1
24	Caja	48	1
25	Caja	1	6
25	Caja	6	1
25	Caja	24	0
25	Caja	48	1
26	Caja	1	5
26	Caja	6	4
26	Caja	24	1
26	Caja	48	1
27	Caja	1	6
27	Caja	6	4
27	Caja	24	2
27	Caja	48	2
28	Caja	1	5
28	Caja	6	3
28	Caja	24	3
28	Caja	48	3
29	Caja	1	4
29	Caja	6	1
29	Caja	24	0
29	Caja	48	0
3	Caja	1	4
3	Caja	6	4
3	Caja	24	2
3	Caja	48	3
30	Caja	1	4
30	Caja	6	0
30	Caja	24	0
30	Caja	48	0
31	Caja	1	3
31	Caja	6	1
31	Caja	24	1
31	Caja	48	1
32	Caja	1	5
32	Caja	6	1
32	Caja	24	1
32	Caja	48	1
33	Caja	1	4
33	Caja	6	2
33	Caja	24	0
33	Caja	48	0
34	Caja	1	3
34	Caja	6	1
34	Caja	24	1
34	Caja	48	1
35	Caja	1	2
35	Caja	6	0
35	Caja	24	1
35	Caja	48	1
36	Caja	1	5
36	Caja	6	3
36	Caja	24	2
36	Caja	48	1
37	Caja	1	5
37	Caja	6	3
37	Caja	24	2
37	Caja	48	0
38	Caja	1	6
38	Caja	6	0
38	Caja	24	2
38	Caja	48	2
39	Caja	1	6
39	Caja	6	2
39	Caja	24	0
39	Caja	48	1
4	Caja	1	5
4	Caja	6	4
4	Caja	24	3
4	Caja	48	3
40	Caja	1	6
40	Caja	6	4
40	Caja	24	3
40	Caja	48	2
41	Caja	1	6
41	Caja	6	2
41	Caja	24	1
41	Caja	48	1
42	Caja	1	5
42	Caja	6	3
42	Caja	24	3
42	Caja	48	2
43	Caja	1	5
43	Caja	6	1
43	Caja	24	2
43	Caja	48	2
44	Caja	1	4
44	Caja	6	0
44	Caja	24	0
44	Caja	48	1
45	Caja	1	2
45	Caja	6	1
45	Caja	24	1
45	Caja	48	1
46	Caja	1	3
46	Caja	6	2
46	Caja	24	1
46	Caja	48	1
47	Caja	1	3
47	Caja	6	2
47	Caja	24	0
47	Caja	48	0
48	Caja	1	6
48	Caja	6	5
48	Caja	24	2
48	Caja	48	2
49	Caja	1	6
49	Caja	6	4
49	Caja	24	2
49	Caja	48	2
5	Caja	1	5
5	Caja	6	5
5	Caja	24	3
5	Caja	48	1
50	Caja	1	6
50	Caja	6	5
50	Caja	24	1
50	Caja	48	3
6	Caja	1	5
6	Caja	6	3
6	Caja	24	3
6	Caja	48	0
7	Caja	1	6
7	Caja	6	2
7	Caja	24	5
7	Caja	48	1
8	Caja	1	4
8	Caja	6	1
8	Caja	24	1
8	Caja	48	1
9	Caja	1	4
9	Caja	6	0
9	Caja	24	0
9	Caja	48	0

## Sheet: Oviposition
Rep	Genotyp	# Eggs
1	DK72-10	14
2	DK72-10	73
3	DK72-10	0
4	DK72-10	0
5	DK72-10	22
6	DK72-10	4
7	DK72-10	41
8	DK72-10	30
9	DK72-10	14
10	DK72-10	20
11	DK72-10	6
12	DK72-10	1
13	DK72-10	22
14	DK72-10	38
15	DK72-10	0
16	DK72-10	0
17	DK72-10	6
18	DK72-10	0
19	DK72-10	0
20	DK72-10	0
21	DK72-10	0
22	DK72-10	0
23	DK72-10	4
24	DK72-10	9
25	DK72-10	8
26	DK72-10	4
27	DK72-10	0
28	DK72-10	5
29	DK72-10	7
30	DK72-10	0
31	DK72-10	29
32	DK72-10	25
33	DK72-10	13
34	DK72-10	1
35	DK72-10	0
36	DK72-10	0
37	DK72-10	0
38	DK72-10	10
39	DK72-10	20
40	DK72-10	2
41	DK72-10	5
42	DK72-10	1
43	DK72-10	0
44	DK72-10	31
45	DK72-10	0
46	DK72-10	14
47	DK72-10	2
48	DK72-10	5
49	DK72-10	3
50	DK72-10	5
1	DK79-10	0
2	DK79-10	57
3	DK79-10	52
4	DK79-10	0
5	DK79-10	0
6	DK79-10	0
7	DK79-10	4
8	DK79-10	55
9	DK79-10	46
10	DK79-10	42
11	DK79-10	0
12	DK79-10	1
13	DK79-10	17
14	DK79-10	0
15	DK79-10	18
16	DK79-10	0
17	DK79-10	45
18	DK79-10	22
19	DK79-10	22
20	DK79-10	3
21	DK79-10	15
22	DK79-10	67
23	DK79-10	15
24	DK79-10	79
25	DK79-10	18
26	DK79-10	0
27	DK79-10	0
28	DK79-10	0
29	DK79-10	54
30	DK79-10	15
31	DK79-10	0
32	DK79-10	0
33	DK79-10	38
34	DK79-10	0
35	DK79-10	99
36	DK79-10	0
37	DK79-10	0
38	DK79-10	0
39	DK79-10	32
40	DK79-10	0
41	DK79-10	6
42	DK79-10	10
43	DK79-10	15
44	DK79-10	26
45	DK79-10	0
46	DK79-10	38
47	DK79-10	0
48	DK79-10	2
49	DK79-10	24
50	DK79-10	11
1	DK670	113
2	DK670	90
3	DK670	66
4	DK670	19
5	DK670	2
6	DK670	18
7	DK670	0
8	DK670	90
9	DK670	4
10	DK670	22
11	DK670	38
12	DK670	8
13	DK670	33
14	DK670	0
15	DK670	4
16	DK670	0
17	DK670	0
18	DK670	64
19	DK670	13
20	DK670	41
21	DK670	25
22	DK670	3
23	DK670	61
24	DK670	3
25	DK670	0
26	DK670	21
27	DK670	22
28	DK670	2
29	DK670	44
30	DK670	17
31	DK670	0
32	DK670	42
33	DK670	54
34	DK670	7
35	DK670	0
36	DK670	80
37	DK670	27
38	DK670	13
39	DK670	0
40	DK670	4
41	DK670	0
42	DK670	2
43	DK670	23
44	DK670	19
45	DK670	80
46	DK670	19
47	DK670	34
48	DK670	22
49	DK670	15
50	DK670	12
1	DKB390	26
2	DKB390	16
3	DKB390	0
4	DKB390	2
5	DKB390	10
6	DKB390	8
7	DKB390	6
8	DKB390	9
9	DKB390	96
10	DKB390	0
11	DKB390	32
12	DKB390	85
13	DKB390	0
14	DKB390	32
15	DKB390	3
16	DKB390	28
17	DKB390	6
18	DKB390	0
19	DKB390	23
20	DKB390	33
21	DKB390	13
22	DKB390	37
23	DKB390	0
24	DKB390	0
25	DKB390	0
26	DKB390	33
27	DKB390	0
28	DKB390	4
29	DKB390	0
30	DKB390	19
31	DKB390	15
32	DKB390	21
33	DKB390	13
34	DKB390	57
35	DKB390	28
36	DKB390	9
37	DKB390	13
38	DKB390	13
39	DKB390	10
40	DKB390	0
41	DKB390	2
42	DKB390	0
43	DKB390	12
44	DKB390	0
45	DKB390	9
46	DKB390	0
47	DKB390	10
48	DKB390	12
49	DKB390	9
50	DKB390	0

## Sheet: Survival
Rep	Genotyp	Moment	# Insects
1	DK72-10	1	2
2	DK72-10	1	3
3	DK72-10	1	5
4	DK72-10	1	3
5	DK72-10	1	0
6	DK72-10	1	2
7	DK72-10	1	0
8	DK72-10	1	0
9	DK72-10	1	1
10	DK72-10	1	5
11	DK72-10	1	2
12	DK72-10	1	4
13	DK72-10	1	1
14	DK72-10	1	0
15	DK72-10	1	4
16	DK72-10	1	1
17	DK72-10	1	5
18	DK72-10	1	4
19	DK72-10	1	5
20	DK72-10	1	2
21	DK72-10	1	3
22	DK72-10	1	2
23	DK72-10	1	2
24	DK72-10	1	4
25	DK72-10	1	1
26	DK72-10	1	5
27	DK72-10	1	3
28	DK72-10	1	4
29	DK72-10	1	5
30	DK72-10	1	3
1	DK72-10	2	1
2	DK72-10	2	0
3	DK72-10	2	0
4	DK72-10	2	1
5	DK72-10	2	0
6	DK72-10	2	2
7	DK72-10	2	0
8	DK72-10	2	0
9	DK72-10	2	0
10	DK72-10	2	4
11	DK72-10	2	2
12	DK72-10	2	0
13	DK72-10	2	0
14	DK72-10	2	0
15	DK72-10	2	0
16	DK72-10	2	1
17	DK72-10	2	0
18	DK72-10	2	2
19	DK72-10	2	0
20	DK72-10	2	0
21	DK72-10	2	3
22	DK72-10	2	1
23	DK72-10	2	2
24	DK72-10	2	3
25	DK72-10	2	0
26	DK72-10	2	4
27	DK72-10	2	1
28	DK72-10	2	3
29	DK72-10	2	3
30	DK72-10	2	2
1	DK72-10	3	1
2	DK72-10	3	0
3	DK72-10	3	0
4	DK72-10	3	1
5	DK72-10	3	0
6	DK72-10	3	2
7	DK72-10	3	0
8	DK72-10	3	0
9	DK72-10	3	0
10	DK72-10	3	0
11	DK72-10	3	0
12	DK72-10	3	0
13	DK72-10	3	0
14	DK72-10	3	0
15	DK72-10	3	0
16	DK72-10	3	0
17	DK72-10	3	0
18	DK72-10	3	0
19	DK72-10	3	0
20	DK72-10	3	0
21	DK72-10	3	1
22	DK72-10	3	0
23	DK72-10	3	0
24	DK72-10	3	0
25	DK72-10	3	0
26	DK72-10	3	0
27	DK72-10	3	0
28	DK72-10	3	0
29	DK72-10	3	0
30	DK72-10	3	2
1	DK72-10	4	1
2	DK72-10	4	0
3	DK72-10	4	0
4	DK72-10	4	0
5	DK72-10	4	0
6	DK72-10	4	0
7	DK72-10	4	0
8	DK72-10	4	0
9	DK72-10	4	0
10	DK72-10	4	0
11	DK72-10	4	0
12	DK72-10	4	0
13	DK72-10	4	0
14	DK72-10	4	0
15	DK72-10	4	0
16	DK72-10	4	0
17	DK72-10	4	0
18	DK72-10	4	0
19	DK72-10	4	0
20	DK72-10	4	0
21	DK72-10	4	0
22	DK72-10	4	0
23	DK72-10	4	0
24	DK72-10	4	0
25	DK72-10	4	0
26	DK72-10	4	0
27	DK72-10	4	0
28	DK72-10	4	0
29	DK72-10	4	0
30	DK72-10	4	0
1	DK79-10	1	4
2	DK79-10	1	4
3	DK79-10	1	2
4	DK79-10	1	4
5	DK79-10	1	5
6	DK79-10	1	5
7	DK79-10	1	5
8	DK79-10	1	4
9	DK79-10	1	5
10	DK79-10	1	4
11	DK79-10	1	4
12	DK79-10	1	5
13	DK79-10	1	5
14	DK79-10	1	3
15	DK79-10	1	5
16	DK79-10	1	5
17	DK79-10	1	4
18	DK79-10	1	5
19	DK79-10	1	5
20	DK79-10	1	5
21	DK79-10	1	3
22	DK79-10	1	4
23	DK79-10	1	5
24	DK79-10	1	4
25	DK79-10	1	3
26	DK79-10	1	5
27	DK79-10	1	3
28	DK79-10	1	4
29	DK79-10	1	5
30	DK79-10	1	5
1	DK79-10	2	4
2	DK79-10	2	4
3	DK79-10	2	2
4	DK79-10	2	4
5	DK79-10	2	5
6	DK79-10	2	5
7	DK79-10	2	5
8	DK79-10	2	3
9	DK79-10	2	4
10	DK79-10	2	4
11	DK79-10	2	4
12	DK79-10	2	5
13	DK79-10	2	5
14	DK79-10	2	3
15	DK79-10	2	5
16	DK79-10	2	5
17	DK79-10	2	3
18	DK79-10	2	5
19	DK79-10	2	5
20	DK79-10	2	5
21	DK79-10	2	1
22	DK79-10	2	4
23	DK79-10	2	5
24	DK79-10	2	4
25	DK79-10	2	3
26	DK79-10	2	4
27	DK79-10	2	3
28	DK79-10	2	4
29	DK79-10	2	5
30	DK79-10	2	4
1	DK79-10	3	4
2	DK79-10	3	3
3	DK79-10	3	1
4	DK79-10	3	4
5	DK79-10	3	5
6	DK79-10	3	5
7	DK79-10	3	4
8	DK79-10	3	3
9	DK79-10	3	4
10	DK79-10	3	3
11	DK79-10	3	3
12	DK79-10	3	4
13	DK79-10	3	4
14	DK79-10	3	2
15	DK79-10	3	5
16	DK79-10	3	4
17	DK79-10	3	2
18	DK79-10	3	5
19	DK79-10	3	5
20	DK79-10	3	5
21	DK79-10	3	1
22	DK79-10	3	4
23	DK79-10	3	5
24	DK79-10	3	3
25	DK79-10	3	2
26	DK79-10	3	3
27	DK79-10	3	3
28	DK79-10	3	4
29	DK79-10	3	5
30	DK79-10	3	1
1	DK79-10	4	4
2	DK79-10	4	3
3	DK79-10	4	0
4	DK79-10	4	4
5	DK79-10	4	2
6	DK79-10	4	2
7	DK79-10	4	2
8	DK79-10	4	3
9	DK79-10	4	4
10	DK79-10	4	3
11	DK79-10	4	1
12	DK79-10	4	4
13	DK79-10	4	3
14	DK79-10	4	2
15	DK79-10	4	4
16	DK79-10	4	4
17	DK79-10	4	2
18	DK79-10	4	4
19	DK79-10	4	4
20	DK79-10	4	5
21	DK79-10	4	1
22	DK79-10	4	4
23	DK79-10	4	5
24	DK79-10	4	3
25	DK79-10	4	1
26	DK79-10	4	3
27	DK79-10	4	2
28	DK79-10	4	4
29	DK79-10	4	3
30	DK79-10	4	1
1	DK670	1	5
2	DK670	1	4
3	DK670	1	4
4	DK670	1	5
5	DK670	1	3
6	DK670	1	5
7	DK670	1	4
8	DK670	1	5
9	DK670	1	5
10	DK670	1	5
11	DK670	1	5
12	DK670	1	5
13	DK670	1	4
14	DK670	1	4
15	DK670	1	5
16	DK670	1	5
17	DK670	1	5
18	DK670	1	5
19	DK670	1	5
20	DK670	1	5
21	DK670	1	5
22	DK670	1	5
23	DK670	1	5
24	DK670	1	5
25	DK670	1	5
26	DK670	1	4
27	DK670	1	4
28	DK670	1	4
29	DK670	1	5
30	DK670	1	5
1	DK670	2	4
2	DK670	2	4
3	DK670	2	3
4	DK670	2	4
5	DK670	2	3
6	DK670	2	3
7	DK670	2	3
8	DK670	2	5
9	DK670	2	5
10	DK670	2	4
11	DK670	2	4
12	DK670	2	4
13	DK670	2	4
14	DK670	2	4
15	DK670	2	4
16	DK670	2	4
17	DK670	2	5
18	DK670	2	5
19	DK670	2	4
20	DK670	2	4
21	DK670	2	4
22	DK670	2	5
23	DK670	2	5
24	DK670	2	4
25	DK670	2	4
26	DK670	2	5
27	DK670	2	4
28	DK670	2	4
29	DK670	2	5
30	DK670	2	5
1	DK670	3	4
2	DK670	3	4
3	DK670	3	3
4	DK670	3	5
5	DK670	3	3
6	DK670	3	3
7	DK670	3	3
8	DK670	3	5
9	DK670	3	4
10	DK670	3	3
11	DK670	3	4
12	DK670	3	4
13	DK670	3	4
14	DK670	3	4
15	DK670	3	4
16	DK670	3	4
17	DK670	3	4
18	DK670	3	4
19	DK670	3	3
20	DK670	3	2
21	DK670	3	3
22	DK670	3	5
23	DK670	3	5
24	DK670	3	4
25	DK670	3	4
26	DK670	3	5
27	DK670	3	4
28	DK670	3	4
29	DK670	3	4
30	DK670	3	5
1	DK670	4	4
2	DK670	4	3
3	DK670	4	3
4	DK670	4	5
5	DK670	4	3
6	DK670	4	3
7	DK670	4	2
8	DK670	4	5
9	DK670	4	3
10	DK670	4	3
11	DK670	4	4
12	DK670	4	1
13	DK670	4	3
14	DK670	4	1
15	DK670	4	4
16	DK670	4	4
17	DK670	4	3
18	DK670	4	4
19	DK670	4	3
20	DK670	4	2
21	DK670	4	3
22	DK670	4	4
23	DK670	4	5
24	DK670	4	3
25	DK670	4	3
26	DK670	4	4
27	DK670	4	4
28	DK670	4	3
29	DK670	4	4
30	DK670	4	5
1	DKB390	1	5
2	DKB390	1	5
3	DKB390	1	5
4	DKB390	1	4
5	DKB390	1	4
6	DKB390	1	4
7	DKB390	1	4
8	DKB390	1	4
9	DKB390	1	5
10	DKB390	1	5
11	DKB390	1	5
12	DKB390	1	5
13	DKB390	1	4
14	DKB390	1	5
15	DKB390	1	5
16	DKB390	1	4
17	DKB390	1	5
18	DKB390	1	5
19	DKB390	1	5
20	DKB390	1	5
21	DKB390	1	4
22	DKB390	1	5
23	DKB390	1	4
24	DKB390	1	5
25	DKB390	1	5
26	DKB390	1	5
27	DKB390	1	5
28	DKB390	1	5
29	DKB390	1	5
30	DKB390	1	5
1	DKB390	2	5
2	DKB390	2	4
3	DKB390	2	4
4	DKB390	2	4
5	DKB390	2	4
6	DKB390	2	3
7	DKB390	2	4
8	DKB390	2	4
9	DKB390	2	5
10	DKB390	2	4
11	DKB390	2	5
12	DKB390	2	5
13	DKB390	2	4
14	DKB390	2	5
15	DKB390	2	5
16	DKB390	2	3
17	DKB390	2	5
18	DKB390	2	5
19	DKB390	2	5
20	DKB390	2	4
21	DKB390	2	4
22	DKB390	2	5
23	DKB390	2	4
24	DKB390	2	5
25	DKB390	2	5
26	DKB390	2	4
27	DKB390	2	5
28	DKB390	2	5
29	DKB390	2	5
30	DKB390	2	5
1	DKB390	3	5
2	DKB390	3	4
3	DKB390	3	4
4	DKB390	3	3
5	DKB390	3	4
6	DKB390	3	2
7	DKB390	3	3
8	DKB390	3	4
9	DKB390	3	5
10	DKB390	3	4
11	DKB390	3	4
12	DKB390	3	4
13	DKB390	3	3
14	DKB390	3	5
15	DKB390	3	5
16	DKB390	3	2
17	DKB390	3	4
18	DKB390	3	4
19	DKB390	3	3
20	DKB390	3	3
21	DKB390	3	4
22	DKB390	3	4
23	DKB390	3	4
24	DKB390	3	3
25	DKB390	3	5
26	DKB390	3	4
27	DKB390	3	4
28	DKB390	3	5
29	DKB390	3	5
30	DKB390	3	4
1	DKB390	4	5
2	DKB390	4	4
3	DKB390	4	4
4	DKB390	4	3
5	DKB390	4	4
6	DKB390	4	2
7	DKB390	4	3
8	DKB390	4	4
9	DKB390	4	4
10	DKB390	4	4
11	DKB390	4	4
12	DKB390	4	3
13	DKB390	4	3
14	DKB390	4	4
15	DKB390	4	5
16	DKB390	4	0
17	DKB390	4	4
18	DKB390	4	4
19	DKB390	4	2
20	DKB390	4	2
21	DKB390	4	3
22	DKB390	4	4
23	DKB390	4	4
24	DKB390	4	2
25	DKB390	4	5
26	DKB390	4	3
27	DKB390	4	3
28	DKB390	4	5
29	DKB390	4	5
30	DKB390	4	4

## Sheet: Symptoms
Rep	Genotyp	Plant	Moment	Symptom Severity
1	DK670	1	20	0
2	DK670	10	20	0
3	DK670	11	20	0
3	DK670	12	20	0
3	DK670	14	20	0
3	DK670	15	20	0
4	DK670	16	20	0
4	DK670	17	20	0
4	DK670	18	20	0
4	DK670	19	20	0
1	DK670	2	20	0
4	DK670	20	20	0
5	DK670	21	20	0
5	DK670	22	20	0
5	DK670	23	20	0
5	DK670	24	20	0
5	DK670	25	20	0
1	DK670	3	20	0
1	DK670	4	20	0
1	DK670	5	20	0
2	DK670	6	20	0
2	DK670	7	20	0
2	DK670	8	20	0
2	DK670	9	20	0
1	DK670	1	45	2
2	DK670	10	45	3
3	DK670	11	45	3
3	DK670	12	45	1
3	DK670	14	45	3
3	DK670	15	45	3
4	DK670	16	45	1
4	DK670	17	45	3
4	DK670	18	45	3
4	DK670	19	45	3
1	DK670	2	45	2
4	DK670	20	45	1
5	DK670	21	45	1
5	DK670	22	45	4
5	DK670	23	45	3
5	DK670	24	45	3
5	DK670	25	45	4
1	DK670	3	45	2
1	DK670	4	45	2
1	DK670	5	45	1
2	DK670	6	45	2
2	DK670	7	45	2
2	DK670	8	45	0
2	DK670	9	45	1
1	DK670	1	65	3
2	DK670	10	65	3
3	DK670	11	65	3
3	DK670	12	65	2
3	DK670	14	65	3
3	DK670	15	65	3
4	DK670	16	65	3
4	DK670	17	65	3
4	DK670	18	65	3
4	DK670	19	65	3
1	DK670	2	65	3
4	DK670	20	65	3
5	DK670	21	65	3
5	DK670	22	65	4
5	DK670	23	65	3
5	DK670	24	65	3
5	DK670	25	65	4
1	DK670	3	65	3
1	DK670	4	65	3
1	DK670	5	65	3
2	DK670	6	65	2
2	DK670	7	65	3
2	DK670	8	65	1
2	DK670	9	65	2
1	DK670	1	85	3
2	DK670	10	85	3
3	DK670	11	85	3
3	DK670	12	85	2
3	DK670	14	85	3
3	DK670	15	85	3
4	DK670	16	85	3
4	DK670	17	85	3
4	DK670	18	85	3
4	DK670	19	85	3
1	DK670	2	85	3
4	DK670	20	85	3
5	DK670	21	85	3
5	DK670	22	85	4
5	DK670	23	85	3
5	DK670	24	85	3
5	DK670	25	85	4
1	DK670	3	85	3
1	DK670	4	85	3
1	DK670	5	85	3
2	DK670	6	85	2
2	DK670	7	85	3
2	DK670	8	85	1
2	DK670	9	85	2
1	DK72-10	1	20	0
2	DK72-10	10	20	0
3	DK72-10	11	20	0
3	DK72-10	12	20	0
3	DK72-10	13	20	0
3	DK72-10	14	20	0
3	DK72-10	15	20	0
4	DK72-10	16	20	0
4	DK72-10	17	20	0
4	DK72-10	18	20	0
4	DK72-10	19	20	0
1	DK72-10	2	20	0
4	DK72-10	20	20	0
5	DK72-10	21	20	0
5	DK72-10	22	20	0
5	DK72-10	23	20	0
5	DK72-10	24	20	0
5	DK72-10	25	20	0
1	DK72-10	3	20	0
1	DK72-10	4	20	0
1	DK72-10	5	20	0
2	DK72-10	6	20	0
2	DK72-10	7	20	0
2	DK72-10	8	20	0
2	DK72-10	9	20	0
1	DK72-10	1	45	0
2	DK72-10	10	45	2
3	DK72-10	11	45	1
3	DK72-10	12	45	0
3	DK72-10	13	45	2
3	DK72-10	14	45	2
3	DK72-10	15	45	0
4	DK72-10	16	45	2
4	DK72-10	17	45	0
4	DK72-10	18	45	2
4	DK72-10	19	45	2
1	DK72-10	2	45	2
4	DK72-10	20	45	2
5	DK72-10	21	45	2
5	DK72-10	22	45	2
5	DK72-10	23	45	0
5	DK72-10	24	45	0
5	DK72-10	25	45	2
1	DK72-10	3	45	1
1	DK72-10	4	45	2
1	DK72-10	5	45	0
2	DK72-10	6	45	0
2	DK72-10	7	45	1
2	DK72-10	8	45	1
2	DK72-10	9	45	2
1	DK72-10	1	65	1
2	DK72-10	10	65	3
3	DK72-10	11	65	1
3	DK72-10	12	65	3
3	DK72-10	13	65	3
3	DK72-10	14	65	2
3	DK72-10	15	65	3
4	DK72-10	16	65	3
4	DK72-10	17	65	1
4	DK72-10	18	65	3
4	DK72-10	19	65	3
1	DK72-10	2	65	3
4	DK72-10	20	65	3
5	DK72-10	21	65	3
5	DK72-10	22	65	3
5	DK72-10	23	65	1
5	DK72-10	24	65	3
5	DK72-10	25	65	3
1	DK72-10	3	65	2
1	DK72-10	4	65	3
1	DK72-10	5	65	3
2	DK72-10	6	65	1
2	DK72-10	7	65	1
2	DK72-10	8	65	1
2	DK72-10	9	65	3
1	DK72-10	1	85	1
2	DK72-10	10	85	3
3	DK72-10	11	85	1
3	DK72-10	12	85	3
3	DK72-10	13	85	3
3	DK72-10	14	85	2
3	DK72-10	15	85	3
4	DK72-10	16	85	3
4	DK72-10	17	85	1
4	DK72-10	18	85	3
4	DK72-10	19	85	3
1	DK72-10	2	85	3
4	DK72-10	20	85	3
5	DK72-10	21	85	3
5	DK72-10	22	85	3
5	DK72-10	23	85	1
5	DK72-10	24	85	3
5	DK72-10	25	85	3
1	DK72-10	3	85	2
1	DK72-10	4	85	3
1	DK72-10	5	85	3
2	DK72-10	6	85	1
2	DK72-10	7	85	1
2	DK72-10	8	85	1
2	DK72-10	9	85	3
1	DK79-10	1	20	0
2	DK79-10	10	20	0
3	DK79-10	11	20	0
3	DK79-10	12	20	0
3	DK79-10	13	20	0
3	DK79-10	14	20	0
3	DK79-10	15	20	0
4	DK79-10	16	20	0
4	DK79-10	17	20	0
4	DK79-10	18	20	0
4	DK79-10	19	20	0
1	DK79-10	2	20	0
4	DK79-10	20	20	0
5	DK79-10	21	20	0
5	DK79-10	22	20	0
5	DK79-10	23	20	0
5	DK79-10	24	20	0
5	DK79-10	25	20	0
1	DK79-10	3	20	0
1	DK79-10	4	20	0
1	DK79-10	5	20	0
2	DK79-10	6	20	0
2	DK79-10	7	20	0
2	DK79-10	8	20	0
2	DK79-10	9	20	0
1	DK79-10	1	45	0
2	DK79-10	10	45	2
3	DK79-10	11	45	0
3	DK79-10	12	45	0
3	DK79-10	13	45	0
3	DK79-10	14	45	0
3	DK79-10	15	45	0
4	DK79-10	16	45	0
4	DK79-10	17	45	0
4	DK79-10	18	45	0
4	DK79-10	19	45	0
1	DK79-10	2	45	0
4	DK79-10	20	45	0
5	DK79-10	21	45	0
5	DK79-10	22	45	0
5	DK79-10	23	45	0
5	DK79-10	24	45	2
5	DK79-10	25	45	0
1	DK79-10	3	45	0
1	DK79-10	4	45	0
1	DK79-10	5	45	0
2	DK79-10	6	45	0
2	DK79-10	7	45	0
2	DK79-10	8	45	0
2	DK79-10	9	45	0
1	DK79-10	1	65	1
2	DK79-10	10	65	2
3	DK79-10	11	65	0
3	DK79-10	12	65	1
3	DK79-10	13	65	2
3	DK79-10	14	65	1
3	DK79-10	15	65	0
4	DK79-10	16	65	1
4	DK79-10	17	65	1
4	DK79-10	18	65	1
4	DK79-10	19	65	2
1	DK79-10	2	65	1
4	DK79-10	20	65	2
5	DK79-10	21	65	1
5	DK79-10	22	65	1
5	DK79-10	23	65	1
5	DK79-10	24	65	2
5	DK79-10	25	65	1
1	DK79-10	3	65	1
1	DK79-10	4	65	1
1	DK79-10	5	65	0
2	DK79-10	6	65	2
2	DK79-10	7	65	1
2	DK79-10	8	65	1
2	DK79-10	9	65	1
1	DK79-10	1	85	1
2	DK79-10	10	85	3
3	DK79-10	11	85	1
3	DK79-10	12	85	3
3	DK79-10	13	85	2
3	DK79-10	14	85	1
3	DK79-10	15	85	1
4	DK79-10	16	85	1
4	DK79-10	17	85	1
4	DK79-10	18	85	1
4	DK79-10	19	85	2
1	DK79-10	2	85	1
4	DK79-10	20	85	3
5	DK79-10	21	85	1
5	DK79-10	22	85	1
5	DK79-10	23	85	1
5	DK79-10	24	85	3
5	DK79-10	25	85	1
1	DK79-10	3	85	1
1	DK79-10	4	85	1
1	DK79-10	5	85	1
2	DK79-10	6	85	3
2	DK79-10	7	85	3
2	DK79-10	8	85	2
2	DK79-10	9	85	3
1	DKB390	1	20	0
2	DKB390	10	20	0
3	DKB390	11	20	0
3	DKB390	12	20	0
3	DKB390	13	20	0
3	DKB390	14	20	0
3	DKB390	15	20	0
4	DKB390	16	20	0
4	DKB390	17	20	0
4	DKB390	18	20	0
4	DKB390	19	20	0
1	DKB390	2	20	0
4	DKB390	20	20	0
5	DKB390	21	20	0
5	DKB390	22	20	0
5	DKB390	23	20	0
5	DKB390	24	20	0
5	DKB390	25	20	0
1	DKB390	3	20	0
1	DKB390	4	20	0
1	DKB390	5	20	0
2	DKB390	6	20	0
2	DKB390	7	20	0
2	DKB390	8	20	0
2	DKB390	9	20	0
1	DKB390	1	45	0
2	DKB390	10	45	0
3	DKB390	11	45	0
3	DKB390	12	45	0
3	DKB390	13	45	0
3	DKB390	14	45	0
3	DKB390	15	45	0
4	DKB390	16	45	0
4	DKB390	17	45	0
4	DKB390	18	45	0
4	DKB390	19	45	0
1	DKB390	2	45	0
4	DKB390	20	45	0
5	DKB390	21	45	0
5	DKB390	22	45	0
5	DKB390	23	45	0
5	DKB390	24	45	0
5	DKB390	25	45	0
1	DKB390	3	45	0
1	DKB390	4	45	0
1	DKB390	5	45	0
2	DKB390	6	45	0
2	DKB390	7	45	0
2	DKB390	8	45	0
2	DKB390	9	45	0
1	DKB390	1	65	0
2	DKB390	10	65	0
3	DKB390	11	65	1
3	DKB390	12	65	0
3	DKB390	13	65	0
3	DKB390	14	65	1
3	DKB390	15	65	0
4	DKB390	16	65	1
4	DKB390	17	65	1
4	DKB390	18	65	1
4	DKB390	19	65	0
1	DKB390	2	65	0
4	DKB390	20	65	0
5	DKB390	21	65	1
5	DKB390	22	65	1
5	DKB390	23	65	0
5	DKB390	24	65	1
5	DKB390	25	65	0
1	DKB390	3	65	1
1	DKB390	4	65	0
1	DKB390	5	65	1
2	DKB390	6	65	1
2	DKB390	7	65	1
2	DKB390	8	65	1
2	DKB390	9	65	0
1	DKB390	1	85	0
2	DKB390	10	85	1
3	DKB390	11	85	1
3	DKB390	12	85	1
3	DKB390	13	85	0
3	DKB390	14	85	1
3	DKB390	15	85	2
4	DKB390	16	85	1
4	DKB390	17	85	1
4	DKB390	18	85	1
4	DKB390	19	85	0
1	DKB390	2	85	0
4	DKB390	20	85	0
5	DKB390	21	85	1
5	DKB390	22	85	1
5	DKB390	23	85	0
5	DKB390	24	85	1
5	DKB390	25	85	0
1	DKB390	3	85	1
1	DKB390	4	85	0
1	DKB390	5	85	1
2	DKB390	6	85	1
2	DKB390	7	85	1
2	DKB390	8	85	1
2	DKB390	9	85	0

## Sheet: ELISA and Yield
Rep	Genotyp	Plant	Yield	Symptoms at 88 DDI	RA	AS
1	DKB390	1	169.5	0	3.6	0
5	DKB390	25	150.8	0	8.84	0
1	DKB390	2	182	0	1.7	0
5	DKB390	23	176.5	0	1.32	0
4	DKB390	20	159.8	0	1.35	0
4	DKB390	19	174.4	0	0.13	0
2	DKB390	9	198.5	0	0.3	0
3	DKB390	13	140.9	0	0.08	0
1	DKB390	4	160.4	0	0.79	0
2	DKB390	10	130.3	1	9.79	1
3	DKB390	12	105.4	1	7.67	1
3	DK79-10	11	48.3	1	3.17	1
3	DK79-10	15	176.5	1	0.07	1
1	DK79-10	5	210.2	1	0.31	1
1	DK79-10	2	91.4	1	3.34	2
3	DKB390	14	107.9	1	10.27	2
4	DK79-10	17	106.3	1	3.34	2
3	DKB390	15	54.4	2	7.72	2
4	DKB390	18	112.7	1	8.49	2
4	DK72-10	17	51.4	1	7.88	2
5	DKB390	21	79.3	1	6.14	2
3	DKB390	11	144	1	9.99	2
1	DK79-10	3	98.2	1	2.13	2
4	DK79-10	16	49.6	1	3.42	2
5	DKB390	22	84.1	1	9.82	2
4	DK79-10	18	126.3	1	3.65	2
1	DK79-10	1	102	1	3.07	2
3	DK79-10	14	130.6	1	2.93	2
1	DK79-10	4	88.4	1	3.22	2
2	DKB390	6	95.5	1	8.57	2
2	DK72-10	6	93.9	1	3.91	2
5	DK79-10	25	76.9	1	3.95	2
5	DK79-10	22	40.8	1	4.05	2
5	DK79-10	21	173.2	1	3.8	2
5	DKB390	24	85	1	9.45	2
4	DKB390	17	153.7	1	8.86	2
2	DKB390	7	89.7	1	8.88	2
5	DK79-10	23	101.7	1	4.26	2
2	DK670	8	100.3	1	6.87	2
5	DK72-10	23	60.7	1	6.67	2
1	DKB390	3	59.2	1	7.71	2
1	DK72-10	1	102.2	1	6.95	2
1	DKB390	5	94.2	1	8.77	2
2	DKB390	8	114.8	1	7.6	2
4	DKB390	16	153.3	1	7.11	2
3	DK72-10	11	112.6	1	3.29	3
2	DK72-10	7	107.5	1	3.69	3
2	DK72-10	8	83.9	1	6.4	3
2	DK79-10	8	32.9	2	3.17	3
2	DK79-10	7	91.1	3	3.65	4
3	DK79-10	12	73.9	3	2.91	4
4	DK79-10	19	104.4	2	3.11	4
2	DK79-10	9	35.9	3	4.97	4
3	DK79-10	13	86.1	2	2.64	4
4	DK79-10	20	67.3	3	3.16	5
1	DK72-10	3	88.7	2	6.07	5
3	DK670	12	70.5	2	5.99	5
2	DK79-10	6	83.8	3	3.3	5
2	DK670	9	80.5	2	6.44	5
3	DK72-10	12	60.9	3	3.69	6
5	DK72-10	24	97.9	3	6.21	6
3	DK72-10	15	42.8	3	7.26	6
1	DK72-10	5	90.3	3	3.2	6
3	DK72-10	14	61.5	2	3.44	6
2	DK670	6	68.3	2	7.04	6
4	DK670	20	57	3	6.74	7
5	DK670	21	58.1	3	5.99	7
2	DK79-10	10	44.2	3	3.03	7
5	DK79-10	24	69.7	3	3.07	7
4	DK670	16	45.6	3	4.96	7
1	DK670	5	43.4	3	6.25	7
5	DK72-10	25	90	3	5.55	8
2	DK670	7	53.2	3	4.28	8
1	DK72-10	2	3.3	3	3.44	8
4	DK72-10	19	54.7	3	3.3	8
4	DK72-10	18	53.8	3	6.32	8
5	DK72-10	21	69.2	3	6.55	8
2	DK72-10	10	68.7	3	6.45	8
1	DK670	4	38.5	3	6.32	8
5	DK72-10	22	11.6	3	2.66	8
1	DK670	3	54.7	3	5.64	8
3	DK72-10	13	58.4	3	6.78	8
2	DK72-10	9	50.8	3	7.13	8
4	DK72-10	20	58	3	7.11	8
4	DK72-10	16	55.5	3	6.23	8
1	DK670	2	67.7	3	6.22	8
1	DK670	1	37.1	3	6.13	8
1	DK72-10	4	56	3	5.94	8
3	DK670	15	40.3	3	6.35	9
3	DK670	11	30.1	3	5.97	9
4	DK670	19	38.8	3	5.61	9
2	DK670	10	39.8	3	6.37	9
3	DK670	14	44.4	3	6.5	9
5	DK670	24	28.9	3	5.47	9
5	DK670	23	14.8	3	5.04	9
4	DK670	17	41.3	3	6.66	9
4	DK670	18	35.6	3	6.66	9
5	DK670	25	17.3	4	7.32	12
5	DK670	22	2.2	4	6.91	12
